# Supplementary material for: Scope 3 emissions: Data quality and machine learning prediction accuracy
Source: PLOS journal article supplement (doi:10.1371/journal.pclm.0000208), 2023-11-15
Supplement: S4 (10.1371/journal.pclm.0000208.s004) [file journal.pclm.0000208.s004]

## Supporting Information for Scope 3 emissions: data quality and machine learning prediction accuracy

**S4 Table. The top five most relevant predictors in stepwise regression**

[illegible]

|                                                       |   |   |   |   |   |   |   |   |   |   |   |
|-------------------------------------------------------|---|---|---|---|---|---|---|---|---|---|---|
| Inventory                                             | 1 | 3 | 2 |   |   |   | 2 | 3 | 3 |   | 2 |
| Gross Intangible Asset                                |   |   |   | 3 | 3 |   |   |   |   |   |   |
| Current Asset                                         | 3 |   |   |   |   |   |   |   |   |   |   |
| GMAR                                                  |   |   |   |   |   |   | 5 |   |   |   |   |
| Current Liability                                     |   |   |   |   |   | 5 |   |   |   |   |   |
| [GICS] Banks                                          |   |   |   |   |   |   |   |   |   | 4 |   |
| [GICS] Commercial & Professional Services             |   |   |   |   |   |   |   |   |   |   |   |
| [GICS] Consumer Services                              |   |   |   |   |   |   |   |   | 1 |   |   |
| [GICS] Diversified Financials                         |   |   |   |   |   |   |   |   |   |   | 3 |
| [GICS] Energy                                         |   | 5 |   |   |   |   | 3 | 3 |   | 4 | 5 |
| [GICS] Food, Beverage & Tobacco                       | 5 |   | 5 |   |   | 2 |   |   |   |   |   |
| [GICS] Household & Personal Products                  |   |   |   |   |   |   |   |   | 4 |   |   |
| [GICS] Insurance                                      |   |   |   |   |   | 2 |   |   |   |   |   |
| [GICS] Materials                                      | 4 | 5 | 3 | 5 |   | 5 | 3 | 2 | 2 | 3 | 3 |
| [GICS] Pharmaceuticals, Biotechnology & Life Sciences |   |   |   |   |   |   |   |   |   | 5 |   |
| [GICS] Retailing                                      |   |   |   |   |   | 3 |   |   |   |   |   |
| [GICS] Software & Services                            |   |   | 3 | 4 |   |   |   |   | 5 |   |   |
| [GICS] Telecommunication Services                     |   |   |   |   |   |   |   |   |   |   |   |
| [GICS] Transportation                                 |   |   |   |   |   | 4 |   |   |   | 5 |   |
| [GICS] Utilities                                      |   | 2 |   |   |   |   |   | 4 |   |   |   |

This table summarises the top five most relevant predictors for each emissions scope in *Forward-Backward Stepwise Regression*, which automatically includes relevant predictors (< 1% significant level) into the model and excludes irrelevant ones (>5% significant level) as described in Section 4.3.2. Rank of each predictor is determined by the order of which the predictors are included into the predictor set.
