# Supplementary material for: Scope 3 emissions: Data quality and machine learning prediction accuracy
Source: PLOS journal article supplement (doi:10.1371/journal.pclm.0000208), 2023-11-15

# Supporting Information for Scope 3 emissions: data quality and machine learning prediction accuracy

**S3 Fig. Completeness and Relevance of Scope 3 emissions category across sectors.**

This figure summarizes the analyses of completeness and relevance of Scope 3 emissions categories across GICS sectors as described in Section 4.2. Panel (a) presents the completeness based on the proportion of firms that choose to disclose each category, panel (b) presents the relevance based on the relative contribution of each category to Scope 3 intensities. Unreported categories (i.e., missing carbon intensity values) are set to zero. The sample is 9,518 observations from firms that disclose the composition of Scope 3 in the Bloomberg

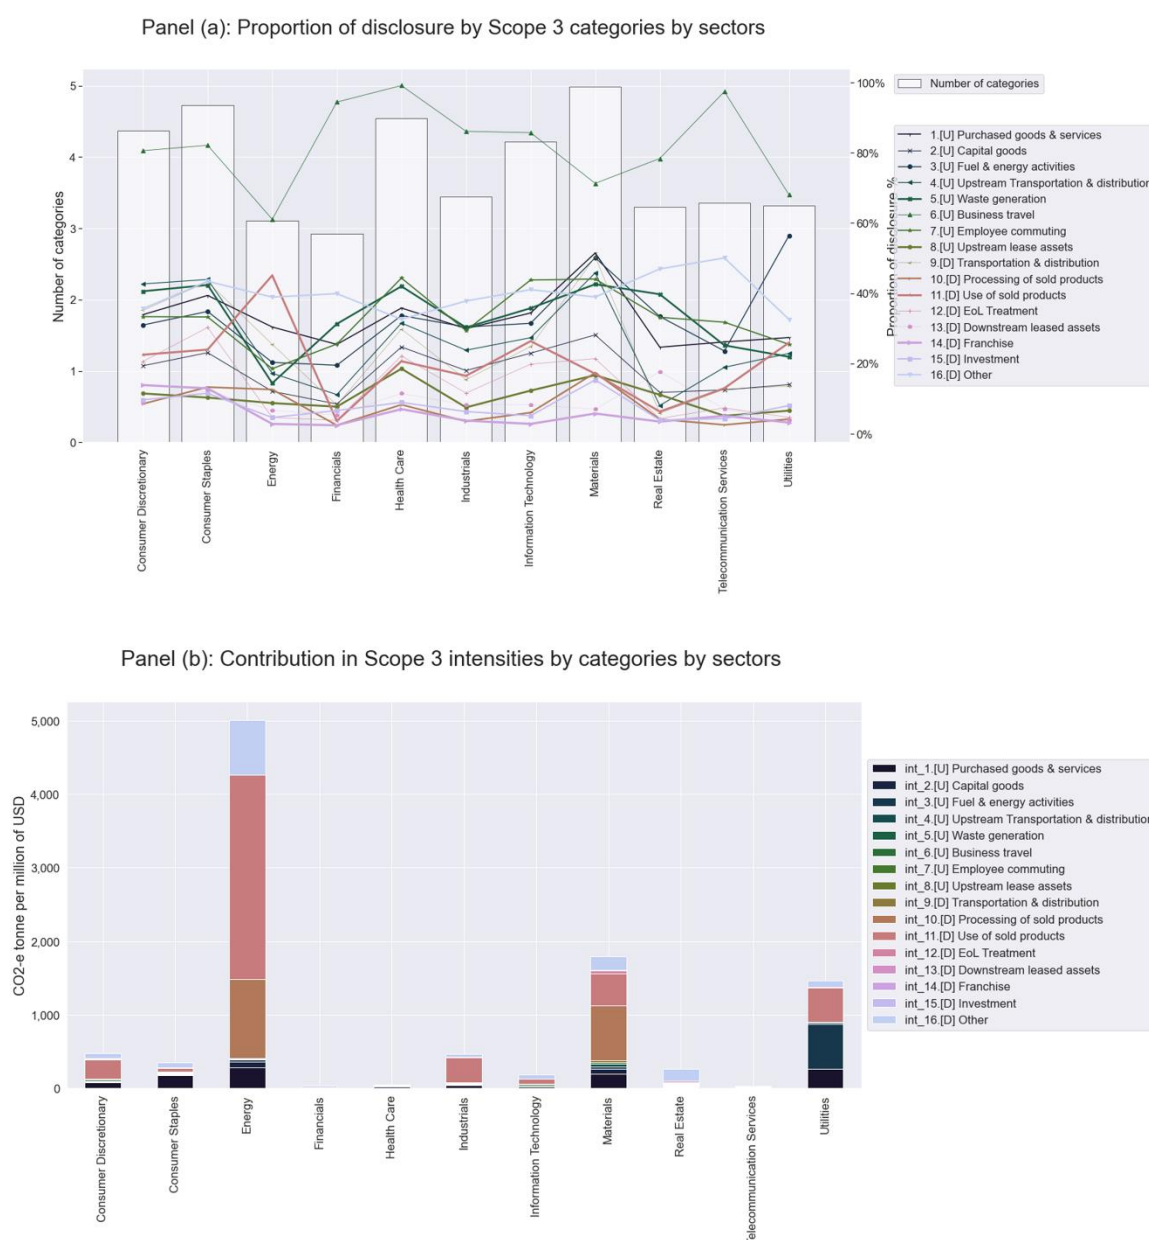

Supplement: S8 (10.1371/journal.pclm.0000208.s008) [file journal.pclm.0000208.s008]
