# Supplementary material for: Scope 3 emissions: Data quality and machine learning prediction accuracy
Source: PLOS journal article supplement (doi:10.1371/journal.pclm.0000208), 2023-11-15

**Fig. S4. Emission profiles after filling in the gaps for unreported categories over years**

This figure summarizes the emission profiles before and after filling in the gaps on all unreported categories for the sample of 9,518 observations from 1,972 firms that disclose the composition of Scope 3 in the Bloomberg dataset in 2010-2019 as described in Section 4.2. The total emissions change from 114,373,422,867 tonnes to 164,321,552,958 tonnes (44% increase).

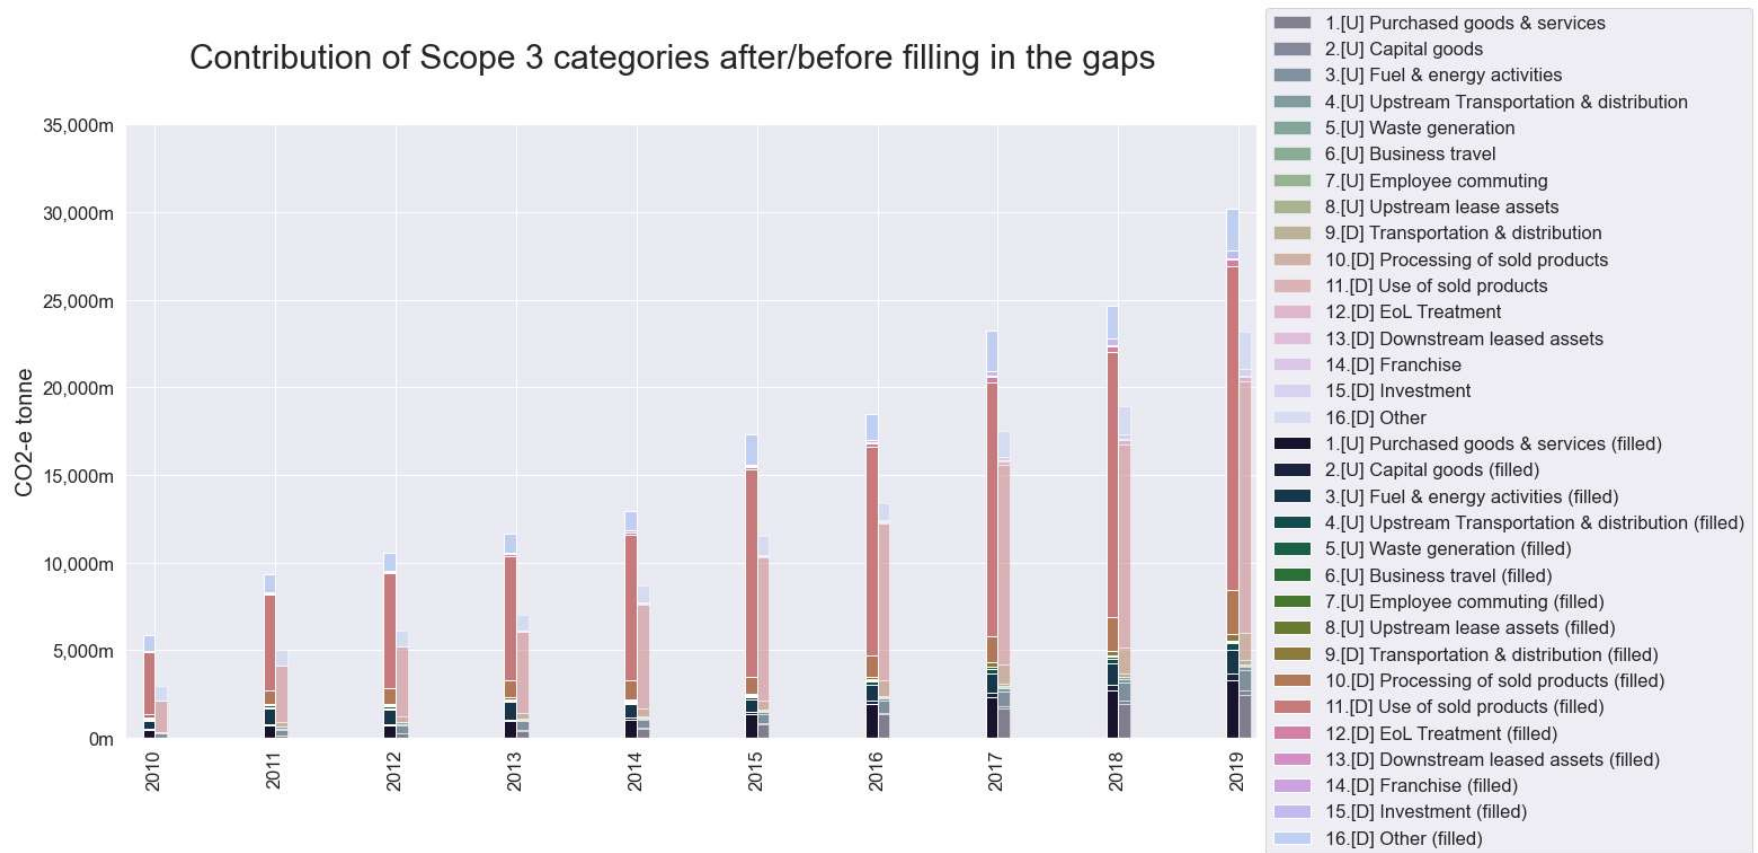

Supplement: S9 (10.1371/journal.pclm.0000208.s009) [file journal.pclm.0000208.s009]
